# Supplementary material
Source: HighWire-hosted journal article supplement (https://erj.ersjournals.com/content/53/2/1800904)
Supplement: inline-supplementary-material-1 [file inline-supplementary-material-1.pdf]

# IMMEDIATE BRONCHODILATOR RESPONSE IN FEV<sub>1</sub> AS A DIAGNOSTIC CRITERION FOR ADULT ASTHMA

Leena E. Tuomisto, MD, PhD<sup>1</sup>, Pinja Ilmarinen, PhD<sup>1</sup>, Lauri Lehtimäki, MD, PhD<sup>2,3</sup>, Minna Tommola MD<sup>1</sup>, Hannu Kankaanranta, MD, PhD<sup>1,2</sup>

<sup>1</sup>Department of Respiratory Medicine, Seinäjoki Central Hospital, Seinäjoki, Finland.

<sup>2</sup>Faculty of Medicine and Life Sciences, University of Tampere, Tampere, Finland

<sup>3</sup>Allergy Centre, Tampere University Hospital, Tampere, Finland

## Online supplementary data

### Abbreviations:

|                       |                                                                                  |
|-----------------------|----------------------------------------------------------------------------------|
| ACCP                  | American College of Chest Physicians                                             |
| ATS                   | American Thoracic Society                                                        |
| BDR                   | Bronchodilator response                                                          |
| BTS/SIGN              | British Thoracic Society/Scottish Intercollegiate Guidelines Network             |
| ERS                   | European Respiratory Society                                                     |
| FEV <sub>1</sub>      | Forced expiratory volume in 1 second                                             |
| ΔFEV <sub>1</sub> BDR | Change in forced expiratory volume in 1 second as a response to a bronchodilator |
| FVC                   | Forced vital capacity                                                            |
| GPIAG                 | General Practice Airways Group                                                   |
| GINA                  | Global Initiative for Asthma                                                     |
| MMEF                  | Maximal mid-expiratory flow                                                      |

### ***Historical BDR cut-off values***

Relevant studies related to the historical interpretation of the  $\Delta FEV_1 BDR$  as an asthma diagnostic tool are shown in Table S1. The first two definitions of asthma associated with intermittent or reversible airway obstruction [S1,S2] were based on consensus and observational studies on acute asthma exacerbations, but neither of these definitions quantified reversibility. The consensus report of the American College of Chest Physicians (ACCP) advised that the presence of measurable reversibility in airway obstruction suggests a diagnosis of asthma, the probable value of bronchodilators or steroids for treatment and a better prognosis than fixed airways obstruction [S3]. The report suggested that significant improvement (15-25% from baseline) in at least two parameters (FVC,  $FEV_1$  and MMEF) was graded as slight reversibility. No references were given. The Intermountain Thoracic Society [S4] required an increase of 15% in the FVC and 12% in the  $FEV_1$  or 45% in the  $FEF_{25-50\%}$  (forced expiratory flow over the middle one-half of the FVC) from baseline values before considering that the patient “improved”, but no cut-off for the absolute change (mL) was defined.

In the 1987 ATS statement [S5], reversibility in spirometry was described to refer to acute obstruction in asthma [S6]. Four years later, the ATS published a statement regarding lung function testing and recommended the use of a cut-off value  $\geq 12\%$  (and  $\geq 200$  mL) measured from baseline as a criterion for a positive  $\Delta FEV_1 BDR$  in adults [S7]. This recommendation was based on six studies [S15, S16, S18-S20]. The current ATS/ERS report [S9] on interpreting spirometry results refers to the same data. These statements have been the key references also included in the GINA reports until 2014 when a document from the General Practice Airways Group (GPIAG) [S11] was included in the reference list. In the GPIAG document, a  $\Delta FEV_1 BDR > 12\%$  *predicted* and  $> 200$  mL was mentioned/recommended, and the NHLBI document [S10] suggested that a  $\Delta FEV_1 BDR > 10\%$  *predicted* may be less biased. However, even the latest GINA report [S12] and BTS/SIGN guidelines [S13] still recommend the use of the  $\Delta FEV_1\%$  of the *initial*  $FEV_1$ .

The main population-based studies that are historically referred to in documents are presented in Table S2. Adult asthma studies of the immediate BDR of  $FEV_1$  referred to in the reports and guidelines are presented in Table S3.

**Table S1. Historical development of the description and cut-off values for the immediate FEV<sub>1</sub> BDR in the recommendations, reports and guidelines on adult asthma or spirometry measurements**

| Document                                   | Year(s)   | Description                                                    | Cut-off level for the $\Delta$ FEV <sub>1</sub> BDR if mentioned | Calculated from                                                      | Bronchodilator                         | Relevant references                                                                                |
|--------------------------------------------|-----------|----------------------------------------------------------------|------------------------------------------------------------------|----------------------------------------------------------------------|----------------------------------------|----------------------------------------------------------------------------------------------------|
| <b>CIBA symposium [S1]</b>                 | 1959      | Reversible                                                     | NR,                                                              | NR                                                                   | Adrenaline+Atropine                    | None                                                                                               |
| <b>ATS [S2]</b>                            | 1962      | Reversible                                                     | NR                                                               | NR                                                                   | NR                                     | None                                                                                               |
| <b>ACCP [S3]</b>                           | 1974      | Suggest asthma<br>Reversibility*: slight<br>moderate<br>marked | 15-25%<br>26-50%<br>> 50%                                        | <i>Initial</i> FEV <sub>1</sub>                                      | NR                                     | None                                                                                               |
| <b>Intermountain Thoracic Society [S4]</b> | 1984      | Improved<br>Markedly improved                                  | $\geq 12$ -24%<br>$\geq 25\%$                                    | <i>Initial</i> FEV <sub>1</sub>                                      | Isoetharine 680 µg                     | Watanabe [S15], Sourk [S16]                                                                        |
| <b>ATS [S5]</b>                            | 1987      | Typical for asthma bronchiale                                  | $\geq 15\%$                                                      | NR                                                                   | NR                                     | Gold [S17]                                                                                         |
| <b>ATS [S6]</b>                            | 1991      | Positive response                                              | $\geq 12\%+200$ ml                                               | <i>Initial</i> FEV <sub>1</sub>                                      | NR                                     | Watanabe [S15], Sourk [S16], Lorber [S18], Dales [S19], Anthonisen [S20], Tweeddale [S21]          |
| <b>ERS [S7]</b>                            | 1993      | Unambiguous BDR                                                | > 12%+200 ml                                                     | <i>Predicted</i> FEV <sub>1</sub>                                    | NR                                     | ATS 1991 [S6]                                                                                      |
| <b>NHLBI [S8]</b>                          | 1997      | Significant                                                    | $\geq 12\%+ >200$ ml                                             | <i>Initial</i> FEV <sub>1</sub>                                      | NR                                     | ATS 1991 [S6]                                                                                      |
| <b>ATS/ERS [S9]</b>                        | 2005      | Positive response/ significant bronchodilation                 | $\geq 12\%+200$ ml                                               | <i>Initial</i> FEV <sub>1</sub>                                      | Salbutamol 4x100 µg with spacer        | ATS 1991 [S6], Pellegrino [S22]                                                                    |
| <b>NHLBI [S10]</b>                         | 2007      | Significant                                                    | $\geq 12\%+>200$ ml<br>or $\geq 10\%$                            | <i>Initial</i> FEV <sub>1</sub><br><i>Predicted</i> FEV <sub>1</sub> | Salbutamol 2-4x100 µg                  | ATS/ERS [S9]<br>Brand [S23], Dales [S19], Appleton [S24], Meslier [S25]                            |
| <b>GPIAG [S11]</b>                         | 2009      | Statistically significant improvement                          | > 12%+200 ml                                                     | <i>Predicted</i> FEV <sub>1</sub>                                    | Salbutamol 4x100 µg with spacer        | Appleton [S24], Calverley [S26], Oukse [S27]                                                       |
| <b>GINA [S12]</b>                          | 2002-2017 | Diagnostic for asthma                                          | > 12%+200 ml<br>Greater confidence if<br>> 15% + 400 ml          | <i>Initial</i> FEV <sub>1</sub>                                      | Salbutamol or equivalent<br>200-400 µg | ATS [S6], GPIAG [S11]<br>Appleton [S24], Pellegrino [S22], Calverley [S26], Oukse [S27], Tan [S28] |
| <b>BTS/SIGN [S13]</b>                      | 2008-2016 | Strongly suggests<br>Positive test                             | > 400 ml<br>$\geq 12\%+200$ ml                                   | NR<br>NR                                                             | NR                                     | ATS/ERS [S9], NICE [S14], Tweeddale [S21]                                                          |
| <b>NICE [S14]</b>                          | 2015,2017 | Positive test                                                  | $\geq 12\%+200$ ml                                               | NR                                                                   | NR                                     | NR                                                                                                 |

ATS=American Thoracic Society, ACCP=American College of Chest Physicians, ERS=European Respiratory Society, NHLBI= National Heart, Lung and Blood Institute, GINA=Global Initiative for Asthma, GPIAG=General Practice Airways Group, BTS/SIGN= British Thoracic Society/Scottish Intercollegiate Guidelines Network, NICE=National Institute for Health and Care Excellence, FEV<sub>1</sub>= Forced expiratory volume in 1 second,  $\Delta$ FEV<sub>1</sub>BDR= Change in forced expiratory volume in 1 second after bronchodilator administration, \* at least in two of three parameters of FEV<sub>1</sub>, FVC = Forced vital capacity or MMEF= Maximal mid-expiratory flow

**Table S2a Background data from population-based studies**

| Study                                 | Country | Inclusion criteria                                          | Exclusion criteria                                                                                                            | N                  | Mean age, years (SD)                | Age range (years)                                | Female (%)     | Asthma (%)    | COPD (%)      | Never smokers (%) | Current smokers (%) | Pack-years      |
|---------------------------------------|---------|-------------------------------------------------------------|-------------------------------------------------------------------------------------------------------------------------------|--------------------|-------------------------------------|--------------------------------------------------|----------------|---------------|---------------|-------------------|---------------------|-----------------|
| <b>Watanabe 1974 [S15]</b>            | USA     | Normal subjects                                             | Lung disease or allergy                                                                                                       | 75                 | 39 (17.9)                           | 20-81                                            | 36             | 0             | 0             | 79                | 21                  | <10             |
| <b>Lorber 1978 [S18]</b>              | USA     | Epidemiologic study                                         | Risk for bronchodilator use                                                                                                   | 1063               | 34                                  | > 8                                              | 48             | 6             | 14            | NR                | 29                  | NR              |
| <b>Dales 1988 [S19]</b><br>groups A-B | Canada  | A: Health survey<br>B: Healthy participants from the survey | A: Risk for bronchodilator use<br>B: Respiratory symptoms, lung disease, ever smokers, pre FEV <sub>1</sub> and pre FVC < 80% | A: 2609<br>B: 1049 | NR                                  | 7-75                                             | A: 48<br>B: NR | A: 6<br>B: 0  | A: 4<br>B: 0  | A: 64<br>B: 100   | A: 19<br>B: 0       | A: NR<br>B: 0   |
| <b>Kainu 2008 [S28]</b><br>groups A-B | Finland | Random postal questionnaire (FinEsS-study)                  | A: None<br>B: At least 1 health question positive, > 5 pack-years                                                             | A: 628<br>B: 219   | A: M:49<br>F:50<br>B: M:47<br>F: 48 | A: M:26-74,<br>F:26-74<br>B: M:26-72,<br>F:26-74 | A: 59<br>B: 65 | A: NR<br>B: 0 | A: NR<br>B: 0 | NR                | A: NR<br>B: 0       | A: NR<br>B: ≤ 5 |
| <b>Tan 2012 [S29]</b>                 | Global  | Healthy subset of a random population                       | Ever smokers, respiratory disease                                                                                             | 3922               | NR                                  | > 40                                             | NR             | 0             | 0             | 100               | 0                   | 0               |
| <b>Quanjer 2017 [S30]</b>             | Global  | Healthy subset of an epidemiological population             | Health problems and ever smokers                                                                                              | 2371               | NR                                  | ≥ 20                                             | 68             | 0             | 0             | NR                | 0                   | NR              |
| <b>Toren 2017 [S31]</b>               | Sweden  | Healthy subpopulation                                       | Respiratory symptoms, lung disease, ever smoker                                                                               | 370                | 56 (0.23)                           | NR                                               | 49             | 0             | 0             | 100               | 0                   | 0               |

NR= not reported, M=male, F=female, COPD= chronic obstructive pulmonary disease, FinEsS=Finland-Estonia-Sweden, FEV<sub>1</sub> = forced expiratory volume in 1 second, FVC=forced volume vital capacity

**Table S2b Results of population-based studies** (see Table S2a for group definitions)

| Study                                     | Pre FEV <sub>1</sub> %<br>Mean (SD)                                | Agent            | Dose<br>(µg)                              | Mode<br>of<br>delivery | Inter<br>val<br>(min) | Mean<br>absolute<br>ΔFEV <sub>1</sub> (mL)<br>(SD) | Mean<br>ΔFEV <sub>1</sub> % of<br>the initial<br>FEV <sub>1</sub> (SD) | Mean<br>ΔFEV <sub>1</sub> % of<br>the<br>predicted<br>FEV <sub>1</sub> (SD) | Upper 95 <sup>th</sup><br>percentile of the<br>absolute<br>ΔFEV <sub>1</sub> BDR (mL) | Upper 95 <sup>th</sup><br>percentile of<br>the ΔFEV <sub>1</sub> % of<br>the initial FEV <sub>1</sub> | Upper 95 <sup>th</sup><br>percentile of<br>the ΔFEV <sub>1</sub> % of<br>the predicted<br>FEV <sub>1</sub> | Comments                                                                                                 |
|-------------------------------------------|--------------------------------------------------------------------|------------------|-------------------------------------------|------------------------|-----------------------|----------------------------------------------------|------------------------------------------------------------------------|-----------------------------------------------------------------------------|---------------------------------------------------------------------------------------|-------------------------------------------------------------------------------------------------------|------------------------------------------------------------------------------------------------------------|----------------------------------------------------------------------------------------------------------|
| <b>Watanabe<br/>1974 [S15]</b>            | 3,6 l (0,86)                                                       | I                | 3-4<br>inh                                | aerosol                | 5                     | 82                                                 | 2.5                                                                    | NR                                                                          | NR                                                                                    | NR                                                                                                    | NR                                                                                                         | The upper 95% confidence<br>limit not reported in the<br>article but is cited later as<br>10.1% (365 mL) |
| <b>Lorber<br/>1978 [S18]</b>              | 99                                                                 | IP               | 2 inh                                     | Misto<br>meter©        | 5                     | NR                                                 | NR                                                                     | NR                                                                          | 315*                                                                                  | 7.7%*                                                                                                 | NR                                                                                                         | *Change calculated from<br>being greater than 95% of<br>the "zero mean change<br>group"***               |
| <b>Dales<br/>1988 [S19]</b><br>groups A-B | A: NR<br>B: >80                                                    | T                | 500                                       | aerosol+<br>spacer     | 20                    | A: 68 (129)<br>B: 57 (128)                         | A: 2.1 (4.3)<br>B: 1.8 (4)                                             | A:NR<br>B:1.8 (4)                                                           | A: NR<br>B: 291                                                                       | A: NR<br>B: 9.0                                                                                       | A: NR<br>B: 9.0                                                                                            |                                                                                                          |
| <b>Kainu<br/>2008 [S28]</b><br>groups A-B | A: M: 93 (14.9),<br>F:95 (13.1)<br>B: M:100 (12.4),<br>F:98 (10.6) | S                | 400                                       | aerosol+<br>spacer     | 15                    | A: 77<br>(CI 69-86)<br>B: 62<br>(CI 50-74)         | A: 2.5<br>(CI 2.2-2.8)<br>B: 1.8<br>(CI 1.4-2.1)                       | NR                                                                          | A: 260 (CI 247-<br>311)<br><br>B: 240 (CI 224-<br>254)                                | A: 8.5 (CI 7.7-<br>10.7)<br><br>B: 5.9 (CI 5.6-<br>7.7)                                               | NR                                                                                                         |                                                                                                          |
| <b>Tan<br/>2012 [S29]</b>                 | NR                                                                 | S                | 200                                       | aerosol+<br>spacer     | 15                    | 72 (130)                                           | 3.1 (6)                                                                | 2.6 (4.8)                                                                   | 284 (CI 263-305)                                                                      | 12.0 (CI 11.2-<br>12.8)                                                                               | 10.0 (CI 9.5-<br>10.5)                                                                                     |                                                                                                          |
| <b>Quanjer<br/>2017 [S30]</b>             | Z-score 0.04                                                       | S or T<br>or IPR | S 400-<br>800<br>T 750-<br>1000<br>IPR 80 | aerosol+<br>spacer     | 10-30                 | Median 71                                          | Median 2.7                                                             | Median<br>2.71                                                              | 320                                                                                   | 13.3                                                                                                  | 11.6                                                                                                       |                                                                                                          |
| <b>Toren<br/>2017 [S31]</b>               | 101 (1)                                                            | S                | 400                                       | NR                     | 15                    | 102 (126)                                          | 3.4 (4.6)                                                              | 3.2 (4.2)                                                                   | 300 (CI 240-380)                                                                      | 10.1 (CI 8.5-<br>11.8)                                                                                | 8.7 (CI 8.0-<br>10.5)                                                                                      |                                                                                                          |

NR= not reported, M=male, F=female, FEV<sub>1</sub> =forced expiratory volume in 1 second, FVC=forced volume vital capacity, I =isoetharine, IP=isoprenaline, S=salbutamol, T=terbutaline, IPR=ipratropium, BDR=bronchodilator response, \*\*\*"zero mean change group" = a subgroup selected on the basis of lung function, in which the mean BDR was zero [S18]

**Table S3 Adult asthma studies of the immediate BDR of FEV<sub>1</sub> referred to in the reports and guidelines**

| Study                        | Subjects                                                           | N                | Age (years) <sup>a</sup> | Female (%) | Asthma diagnosis based on | Therapy naive | Smoking status(%) |    | Mean absolute ΔFEV <sub>1</sub> (mL) | value ΔFEV <sub>1</sub> % of the initial FEV <sub>1</sub> | of the ΔFEV <sub>1</sub> % of the predicted FEV <sub>1</sub> |
|------------------------------|--------------------------------------------------------------------|------------------|--------------------------|------------|---------------------------|---------------|-------------------|----|--------------------------------------|-----------------------------------------------------------|--------------------------------------------------------------|
| <b>Nicklaus 1969 [S32]</b>   | PreFEV <sub>1</sub> <85% and a history of asthma                   | 50               | 31 (range 15-60)         | 20         | Clinical history          | NR            | NR                | NR | NR                                   | NR                                                        | 15.0 (range 3-43)                                            |
| <b>Eliasson 1985 [S33]</b>   | Outpatients with asthma                                            | A: F30<br>B: M30 | A: 37 (8)<br>B: 53 (19)  | 50         | Chart review              | NR            | NR                | NR | A: 274 (SD 278)<br>B: 264 (SD 225)   | A: 13.7 (SD 16)<br>B: 14.8 (SD 16)                        | A: 10.4 (SD 10)<br>B: 7.8 (SD 7)                             |
| <b>Brand 1992 [S23]</b>      | 1. preFEV <sub>1</sub> >1.2 L<br>2. FEV <sub>1</sub> PC20 <8 mg/mL | 99               | Median 40                | 36         | ATS 1987                  | No            | 32                | 36 | 550 (SEM 40)                         | 25.9 (SEM 1.8)                                            | 15.2 (SEM 0.9)                                               |
| <b>Pellegrino 1998 [S22]</b> | Chronic obstruction*                                               | 50               | NR                       | 26         | ATS 1962                  | No            | NR                | NR | 350 (SD 260)                         | 19 (SD 18)                                                | NR                                                           |
| <b>Oukseel 2003 [S27]</b>    | A: adult asthma<br>B: childhood asthma                             | A: 15<br>B: 15   | A: 54 (12)<br>B: 11 (3)  | NR         | Clinical history          | No            | NR                | 0  | 540 (SD 260) <sup>#</sup>            | NR                                                        | 21.8 (SD 8.0) <sup>#</sup>                                   |

<sup>a</sup> Data are shown as the mean ± SD (=standard deviation), NR=not reported, F=female, M=male, SEM=standard error of the mean, mL=millilitre, ATS=American Thoracic Society, FEV<sub>1</sub>PC20 = provocative concentration of histamine causing a 20% fall in FEV<sub>1</sub>, ΔFEV<sub>1</sub>BDR= Change in forced expiratory volume in 1 second after bronchodilator, \*Other group of this study reported in guidelines, <sup>#</sup>results of adult asthmatics not reported separately

## SUPPLEMENTAL REFERENCES

- S1 Ciba Guest Symposium Report. Terminology, definitions and classification of chronic pulmonary emphysema and related conditions. *Thorax* 1959; 14:286-99.
- S2 American Thoracic Society: Chronic bronchitis, asthma, and pulmonary emphysema: A statement by the Committee on Diagnostic Standards for Nontuberculous Respiratory Diseases. *Amer Rev Resp Dis* 1962; 85:762-768.
- S3 Snider GL, Woolf CR, Kory RC, Ross J. Committee on Emphysema American College of Chest Physicians. Criteria for the assessment of reversibility in airways obstruction. Report of the Committee on Emphysema American College of Chest Physicians. *Chest* 1974;65 (5):552–553.
- S4 Morris AH, Kanner RE, Crapo RO, Gardner RM. Clinical function testing: a manual of uniform laboratory procedures. 2<sup>nd</sup> ed. Salt Lake City, UT: Intermountain Thoracic Society 1984.
- S5 American Thoracic Society. Standardisation of spirometry: 1987 update. *Am Rev Respir Dis* 1987; 136:1285-98.
- S6 American Thoracic Society. Lung function testing: selection of reference values and interpretative strategies. *Am Rev Respir Dis* 1991;144:1202–1218.
- S7 Quanjer PH, Tammeling GJ, Cotes JE, Pedersen OF, Peslin R, Yernault JC. Lung volumes and forced ventilatory flows. Report Working Party Standardization of Lung Function Tests, European Community for Steel and Coal. Official Statement of the European Respiratory Society. *Eur Respir J* 1993; 6: Suppl. 16, 5–40.
- S8 National Heart, Lung, and Blood Institute. Expert panel report 2: guidelines for the diagnosis and management of asthma (EPR-2 1997).
- S9 Pellegrino R, Viegi G, Brusasco V, Crapo RO, Burgos F, Casaburi R, Coates A, van der Grinten CP, Gustafsson P, Hankinson J, Jensen R, Johnson DC, MacIntyre N, McKay R, Miller MR, Navajas D, Pedersen OF, Wanger J. ATS/ERS Task force. Interpretative strategies for lung function tests. *Eur Respir J* 2005;26(5):948-68.
- S10 National Heart, Lung, and Blood Institute. Expert panel report 3: guidelines for the diagnosis and management of asthma—full report 2007. August 28, 2007. Available at: [www.nhlbi.nih.gov/guidelines/asthma/asthgdln.pdf](http://www.nhlbi.nih.gov/guidelines/asthma/asthgdln.pdf). Accessed April 12, 2018.
- S11 Levy ML, Quanjer PH, Booker R, Cooper BG, Holmes S, Small I; General Practice Airways Group. Diagnostic spirometry in primary care: Proposed standards for general practice compliant with American Thoracic Society and European Respiratory Society recommendations: a General Practice Airways Group (GPIAG) document, in association with the Association for Respiratory Technology & Physiology (ARTP) and Education for Health. *Prim Care Respir J* 2009;18:130-47.
- S12 Global Initiative for Asthma: Global Strategy for Asthma Management and Prevention. Updated 2017. <http://www.ginasthma.org/>. Date last accessed: February 15<sup>th</sup> 2017.
- S13 BTS/SIGN - British Thoracic Society, Scottish Intercollegiate Guidelines Network. British Guideline on the Management of Asthma. Available from: URL:<http://www.brit-thoracic.org.uk>. Last accessed on 2018 Jan 8.
- S14 National Institute for Health and Care Excellence (NICE). Asthma: diagnosis, monitoring and chronic asthma management. London: NICE; 2017. Date last accessed December 4, 2017

- S15 Watanabe S, Renzetti AD Jr, Begin R, Bigler AH. Airway responsiveness to a bronchodilator aerosol. *Am Rev Respir Dis* 1974; 109: 530–537.
- S16 Sourk RL, Nugent KM. Bronchodilator testing: confidence intervals derived from placebo inhalations. *Am Rev Respir Dis* 1983;128:153–157.
- S17 Gold WM. Clinical and physiologic evaluation of asthma. *Chest* 1985; 87(Suppl:30S-2SI).
- S18 Lorber DB, Kaltenborn W, Burrows B. Responses to isoproterenol in a general population sample. *Am Rev Respir Dis* 1978; 118: 855–861.
- S19 Dales RE, Spitzer WO, Tousignant P, Schechter M, Suissa S. Clinical interpretation of airway response to a bronchodilator. Epidemiologic considerations. *Am Rev Respir Dis* 1988;138:317–320.
- S20 Anthonisen NR, Wright EC, the IPPB Trial group. Bronchodilator response in chronic obstructive pulmonary disease. *Am Rev Respir Dis* 1986; 133: 814–819.
- S21 Tweeddale PM, Alexander F, McHardy GJR. Short term variability in FEV1 and bronchodilator responsiveness in patients with obstructive ventilatory defects. *Thorax* 1987; 42: 487–490.
- S22 Pellegrino R, Rodarte JR, Brusasco V. Assessing the reversibility of airway obstruction. *Chest* 1998; 114:1607–1612.
- S23 Brand PL, Quanjer PhH, Postma DS, Kerstjens HA, Koëter GH, Dekhuijzen PN, Sluiter HJ. Interpretation of bronchodilator response in patients with obstructive airways disease. *Thorax* 1992; 47: 429–436.
- S24 Appleton SL, Adams RJ, Wilson DH, Taylor AW, Ruffin RE. North West Adelaide Cohort Health Study Team. Spirometric criteria for asthma: adding further evidence to the debate. *J Allergy Clin Immunol*. 2005 Nov;116(5):976-82.
- S25 Meslier N, Racineux JL, Six P, Lockhart A. Diagnostic value of chronic obstruction to separate asthma from chronic bronchitis: a statistical approach. *Eur Respir J* 1989;2:497–505.
- S26 Calverley PMA, Burge PS, Spencer S, Anderson JA, Jones PW. Bronchodilator reversibility testing in chronic obstructive pulmonary disease. *Thorax* 2003;58:659–64.
- S27 Ouksel H, Meslier N, Badatcheff-Coat A, Racineux JL. Influence of predicted FEV1 on bronchodilator response in asthmatic patients. *Respiration* 2003;70:54-9.  
<http://dx.doi.org/10.1159/000068419>.
- S28 Kainu A, Lindqvist A, Sarna S, Lundbäck B, Sovijärvi A. FEV1 response to bronchodilation in an adult urban population. *Chest* 2008;134:387e93. 20.
- S29 Tan WC, Vollmer WM, Lamprecht B, Mannino DM, Jithoo A, Nizankowska-Mogilnicka E, Mejza F, Gislason T, Burney PG, Buist AS; BOLD Collaborative Research Group Worldwide patterns of bronchodilator responsiveness: results from the Burden of Obstructive Lung Disease study. *Thorax*. 2012 Aug;67(8):718-26. doi: 10.1136/thoraxjnl-2011-201445.
- S30 Quanjer PH, Ruppel GL, Langhammer A, Krishna A, Mertens F, Johannessen A, Menezes AMB, Wehrmeister FC, Perez-Padilla R, Swanney MP, Tan WC, Bourbeau J. Bronchodilator Response in FVC Is Larger and More Relevant Than in FEV1 in Severe Airflow Obstruction. *Chest*. 2017;151(5):1088-1098



- S31 Torén K, Bake B, Olin AC, Engström G, Blomberg A, Vikgren J, Hedner J, Brandberg J, Persson HL, Sköld CM, Rosengren A, Bergström G, Janson C. Measures of bronchodilator response of FEV<sub>1</sub>, FVC and SVC in a Swedish general population sample aged 50-64 years, the SCAPIS Pilot Study. *Int J Chron Obstruct Pulmon Dis*. 2017 12:973-980. doi: 10.2147/COPD.S127336.
- S32 Nicklaus TM, Burgin WW Jr, Taylor JR. Spirometric tests to diagnose suspected asthma. *Am Rev Respir Dis* 1969;100:153e9.
- S33 Eliasson O, Degraff AC, Jr. The use of criteria for reversibility and obstruction to define patient groups for bronchodilator trials. Influence of clinical diagnosis, spirometric, and anthropometric variables. *Am Rev Respir Dis*. 1985;132: 858–864.
